# Supplementary material
Source: PubMed Central journal article supplement (PMC1200267)

**post-activated  
1 h**

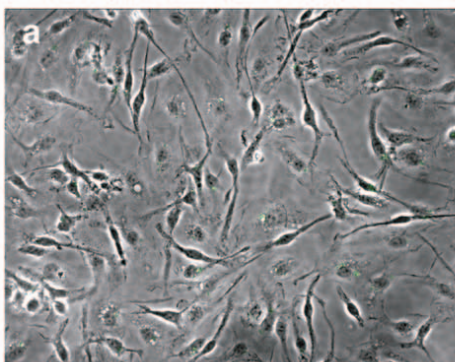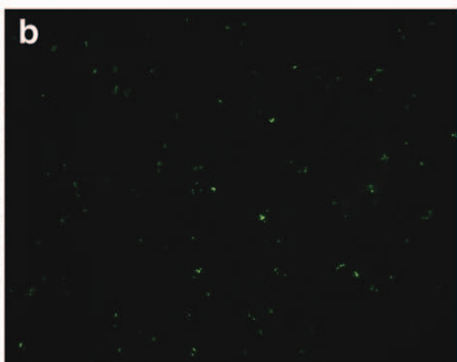

**no treatment  
25 h**

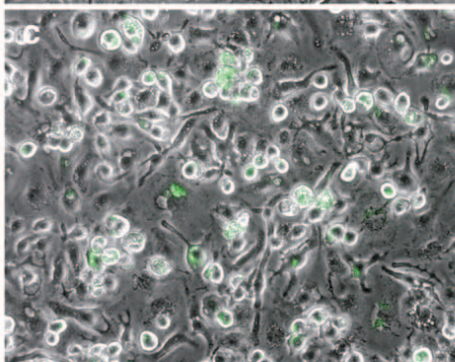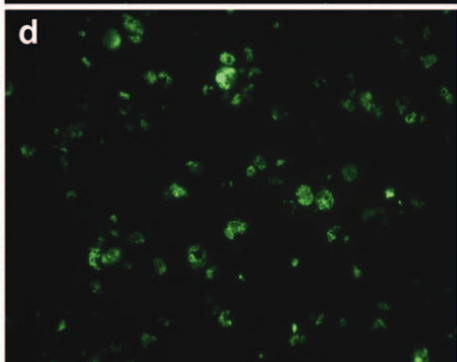

**post-activated  
25 h**

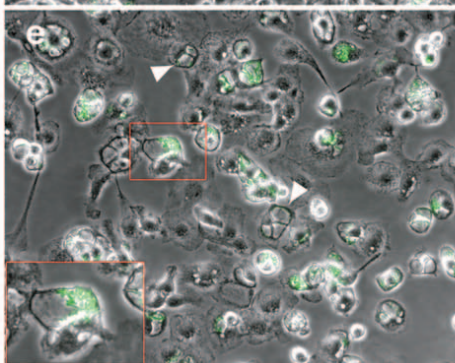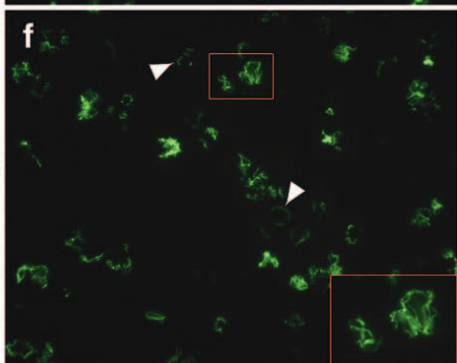

Supplement: pnas_0502849102_1.pdf [file pnas_0502849102_1.pdf]

**A****KIM6+****KIM6ripA****KIM6ripA/prpA+****no treatment**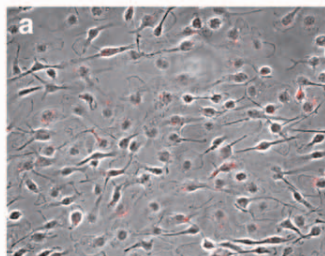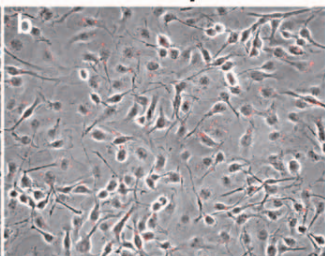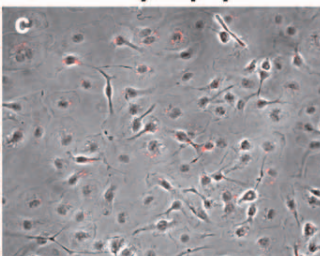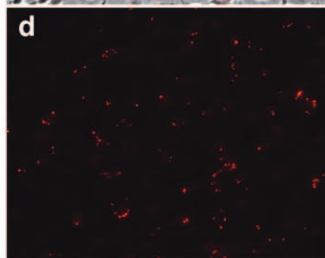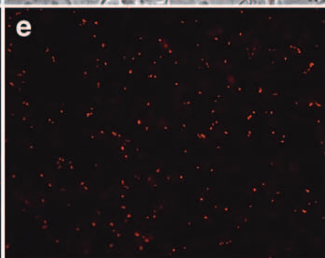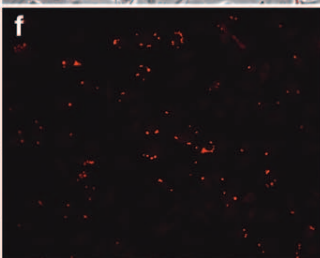**post-activated**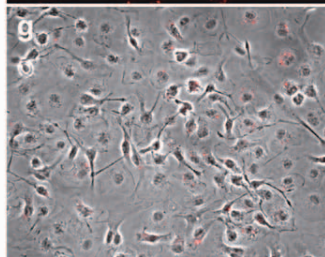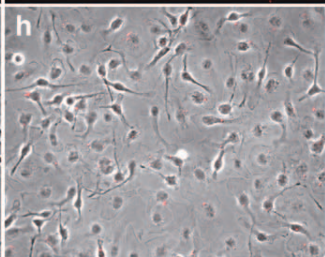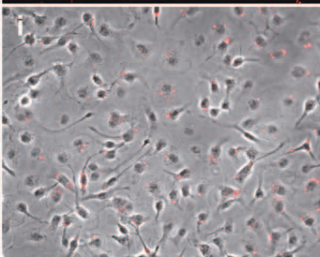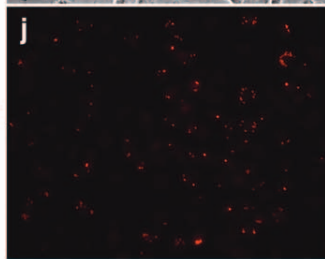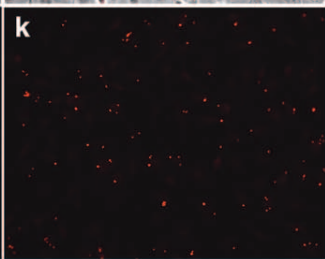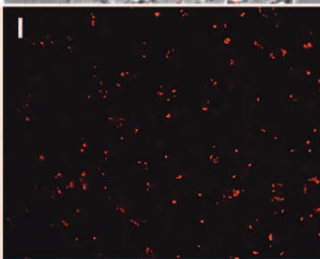

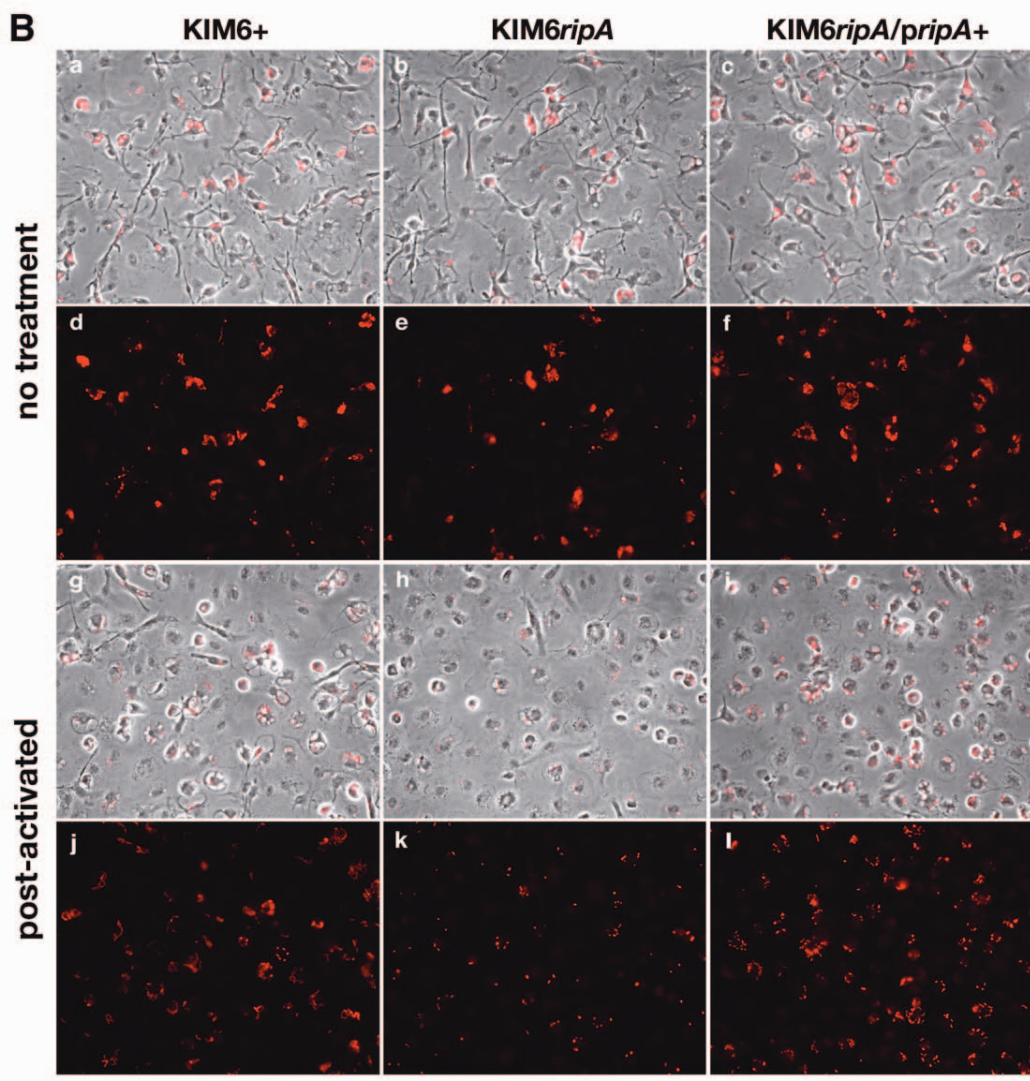

Supplement: pnas_0502849102_2.pdf [file pnas_0502849102_2.pdf]
